# Supplementary material for: Development and Validation of an Occlusal Cant Index
Source: Research Square preprint supplement (doi:10.21203/rs.3.rs-989828/v1), 2022-02-17

**Occlusal Cant Detection Threshold Questionnaire:**

**The Questionnaire Link:** <https://survey.alchemer.com/s3/6428400/Occlusal-Cant-Detection-Survey>

Dear Participant,

Thank you for agreeing to take part in this online questionnaire survey with a study title of:

The Development and Validation of an Occlusal Cant Identifying Tool and an Occlusal Cant Index.

The purpose of this online survey is to detect the amount of occlusal rotation using a set of 11 photographs. You will assess the smile for each image, and it will take approximately 5-7 minutes to complete this questionnaire.

If you are willing to participate voluntarily in this online survey, please click “Next” to begin.

1. Gender: Male  Female
2. Occupation: Orthodontist  Other
3. Place of Practice: KSU  KSAU  PNU
4. Is there an occlusal cant in the following photo: Yes  No


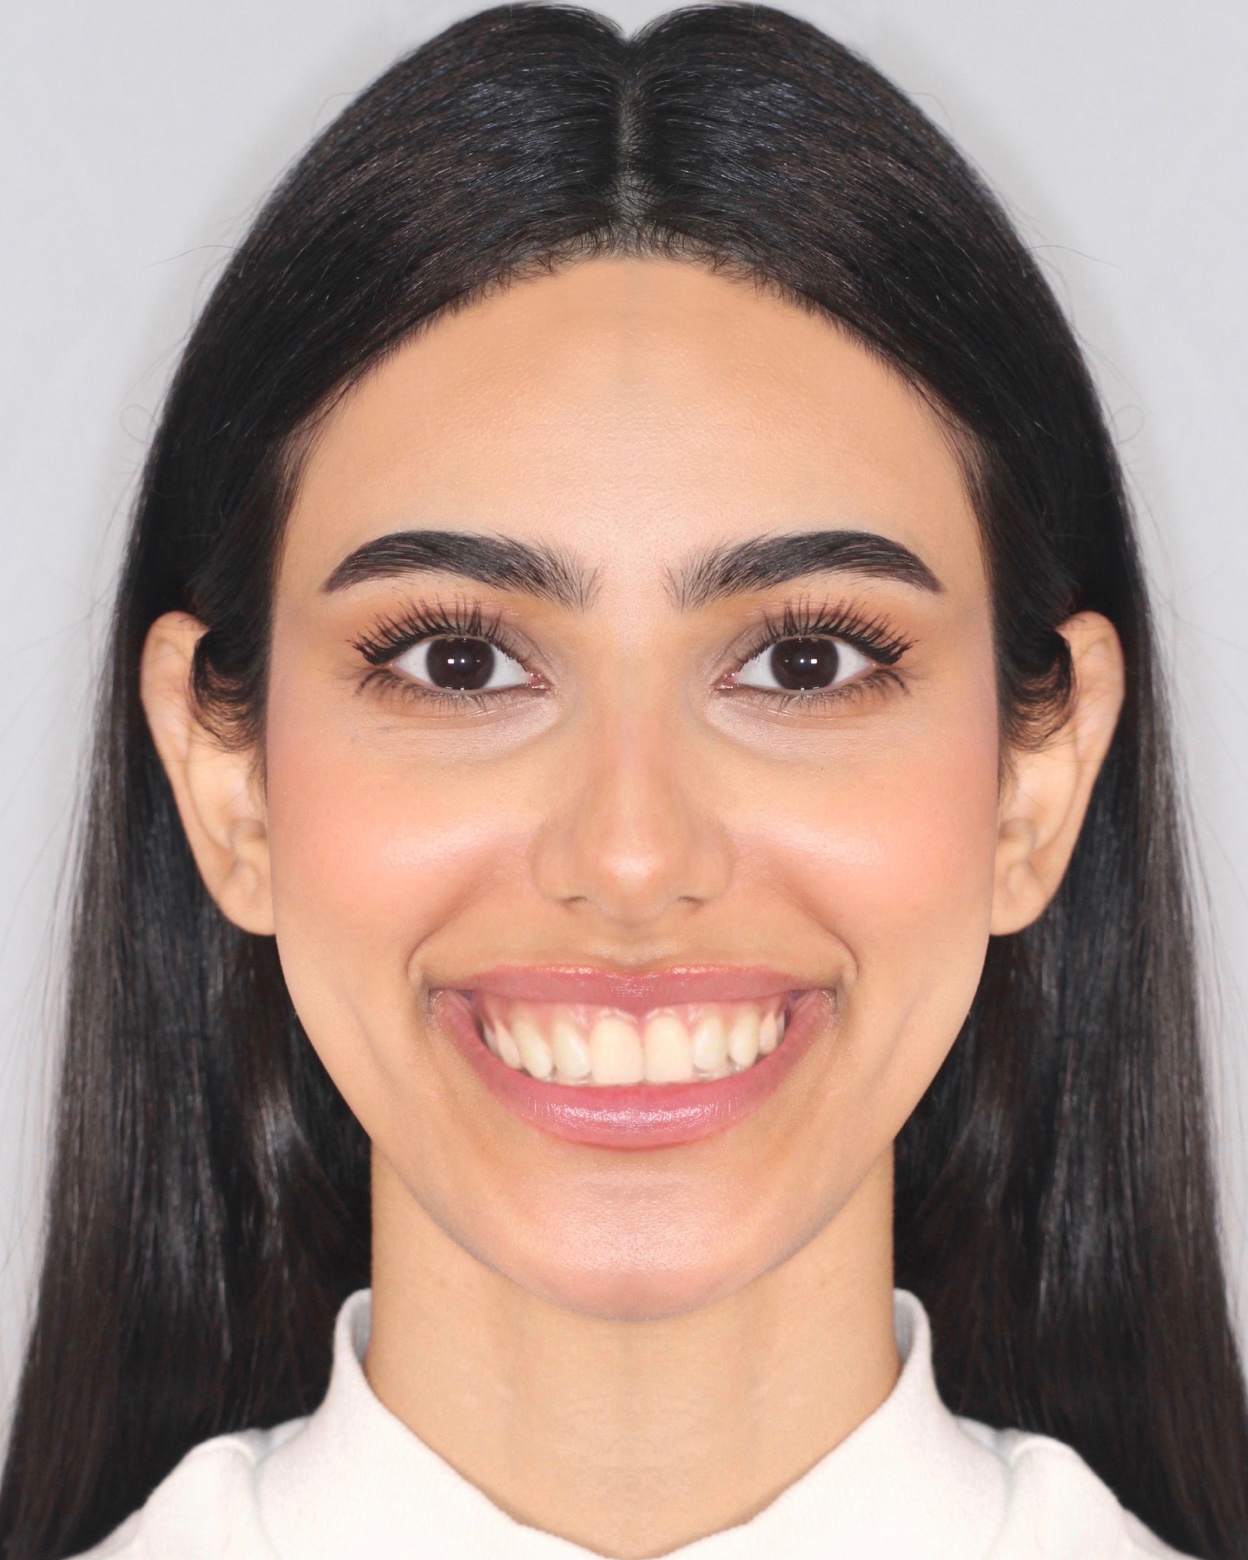


1. Is there an occlusal cant in the following photo: Yes  No


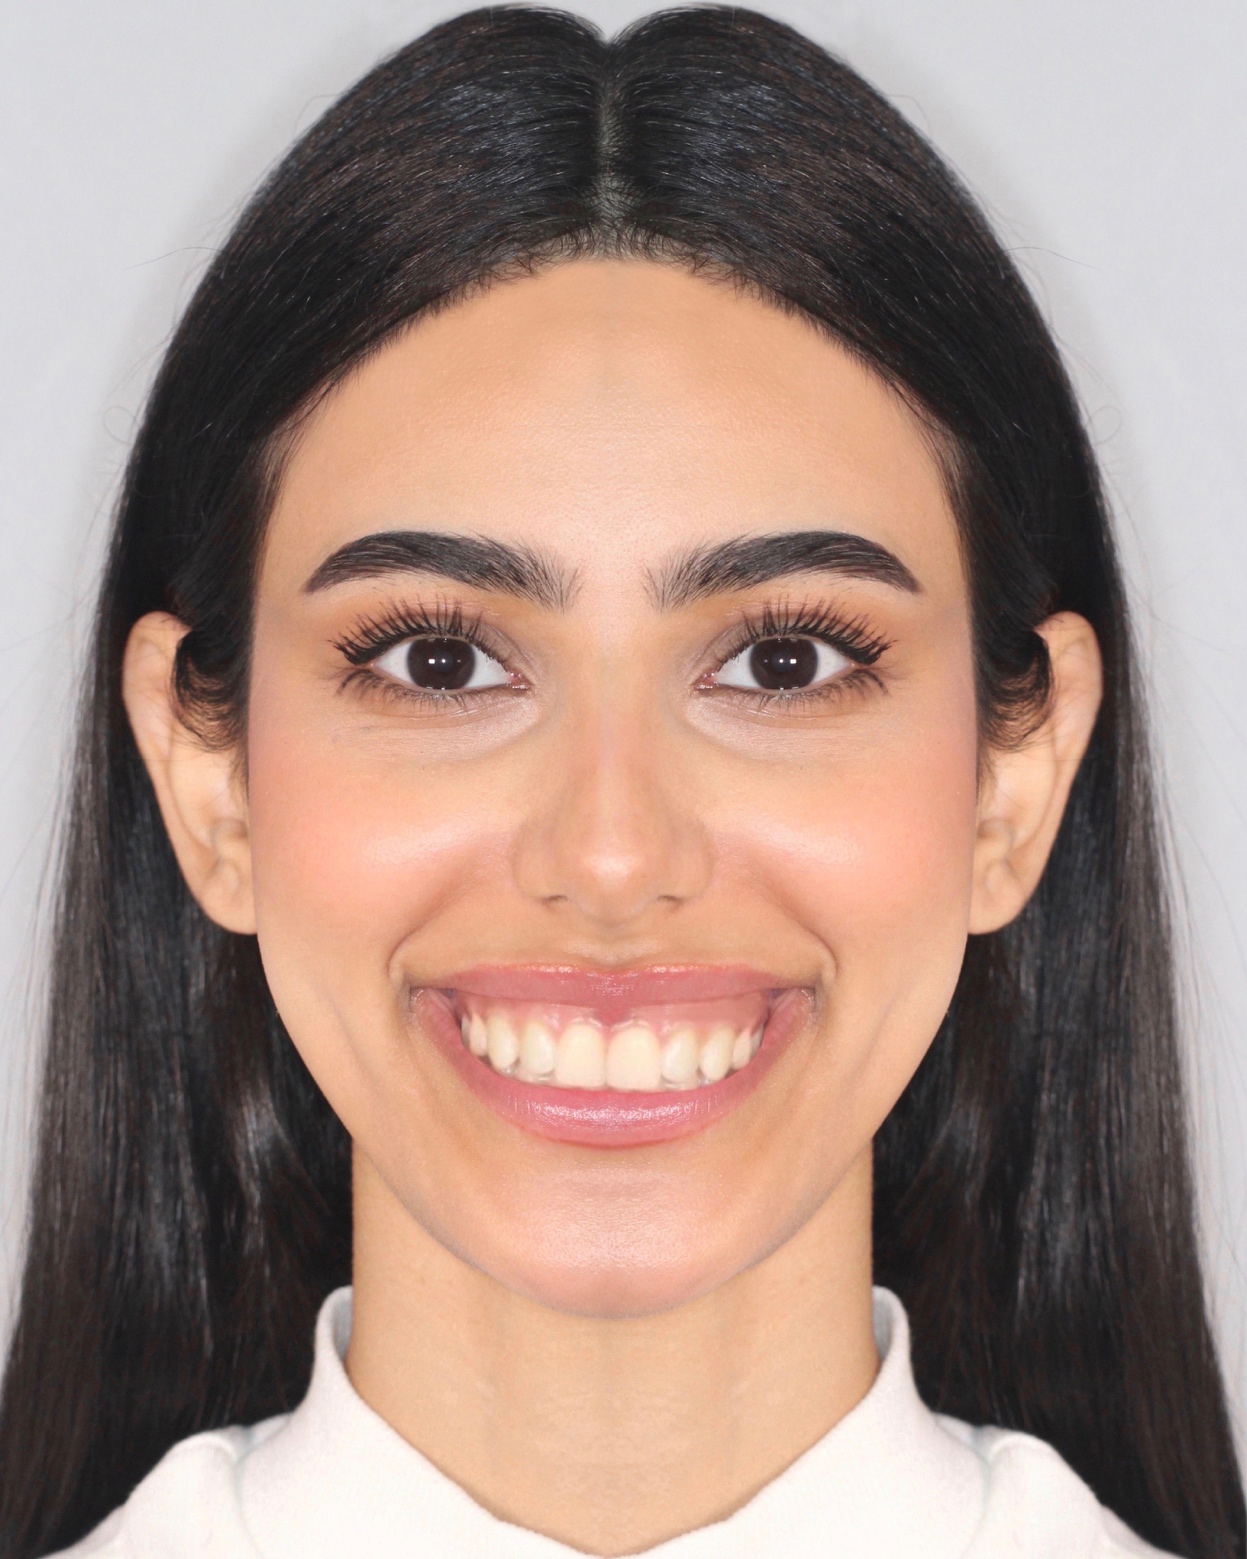


1. Is there an occlusal cant in the following photo: Yes  No


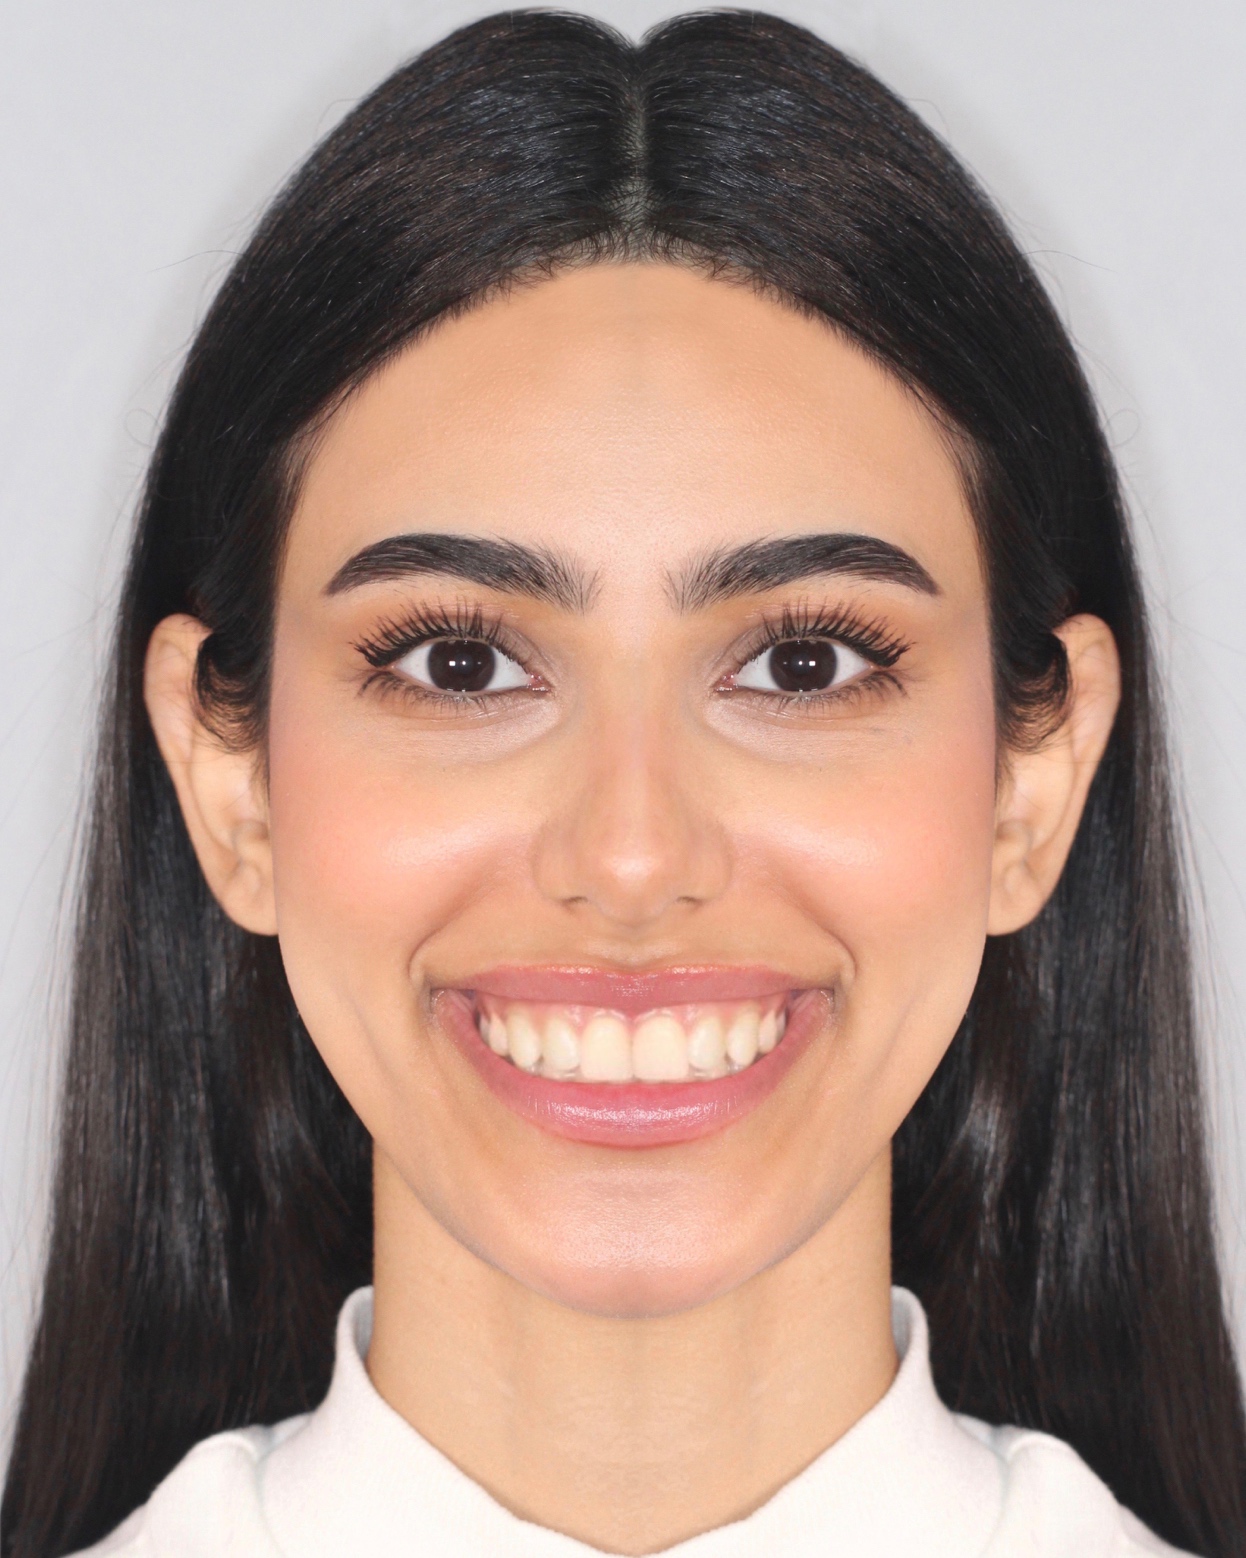


1. Is there an occlusal cant in the following photo: Yes  No


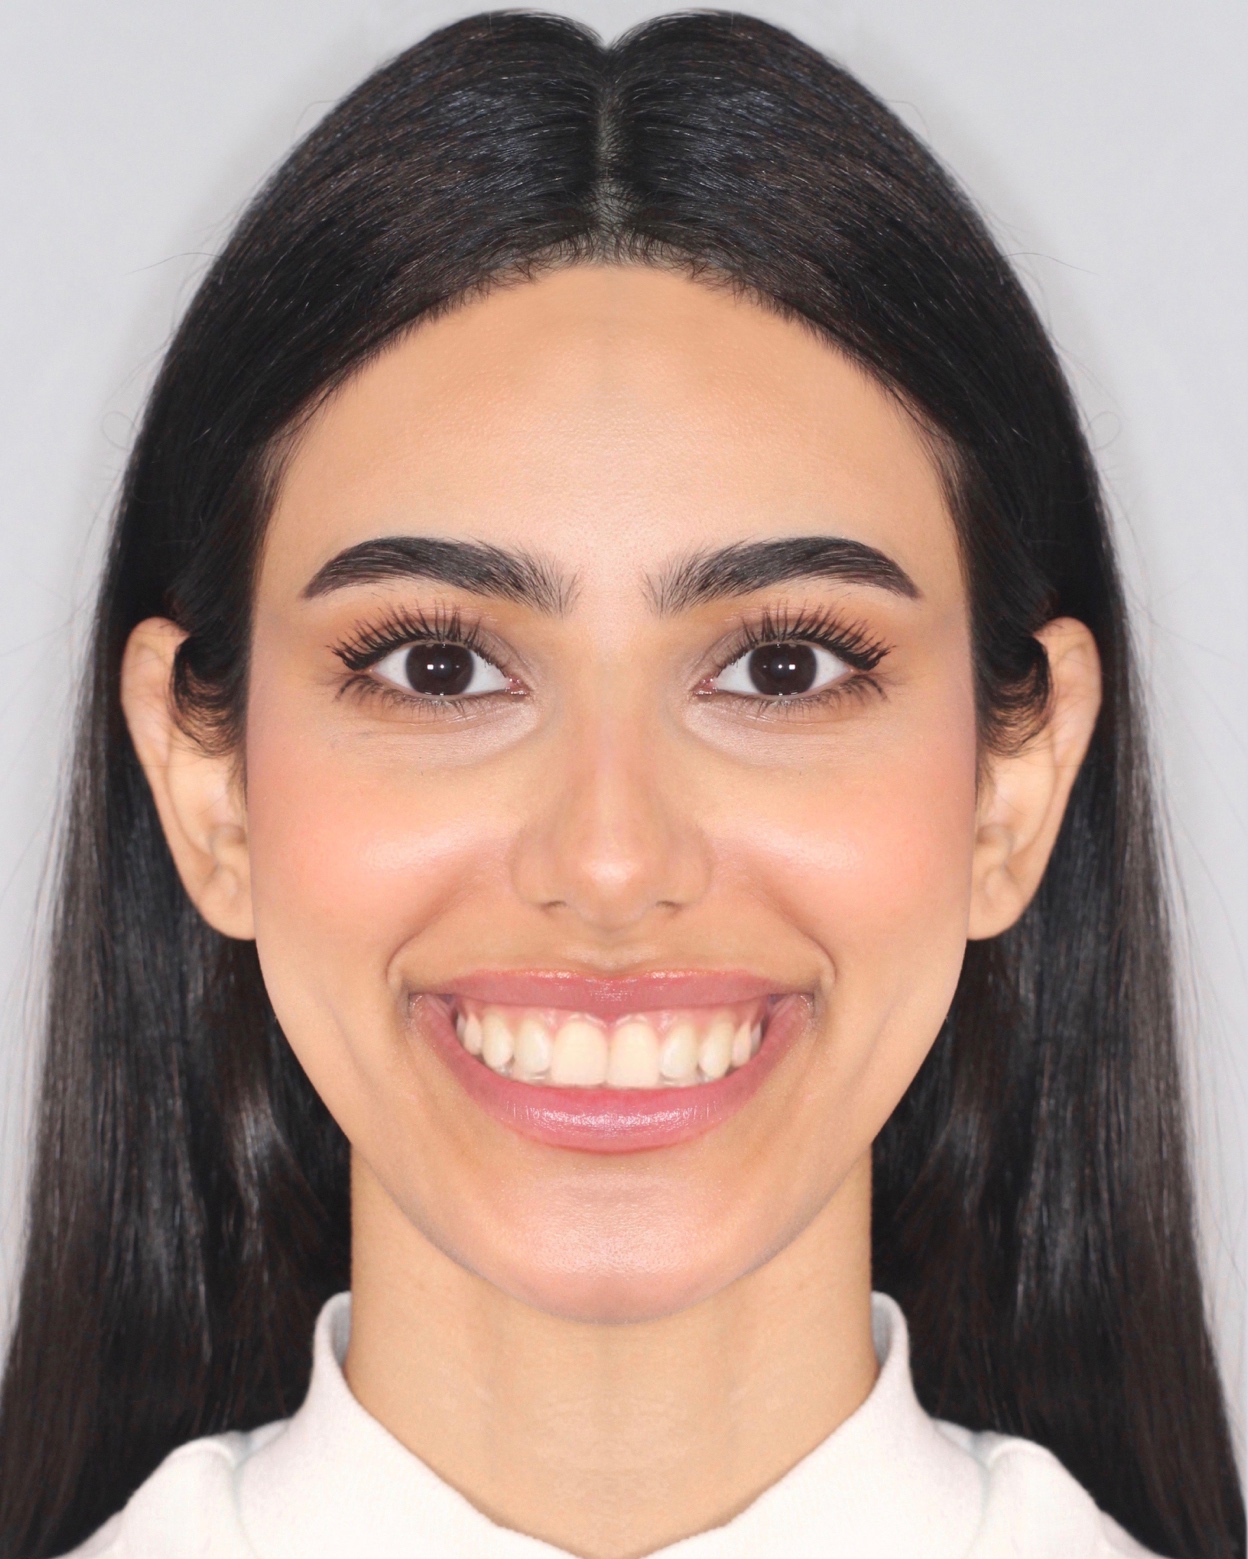


1. Is there an occlusal cant in the following photo: Yes  No


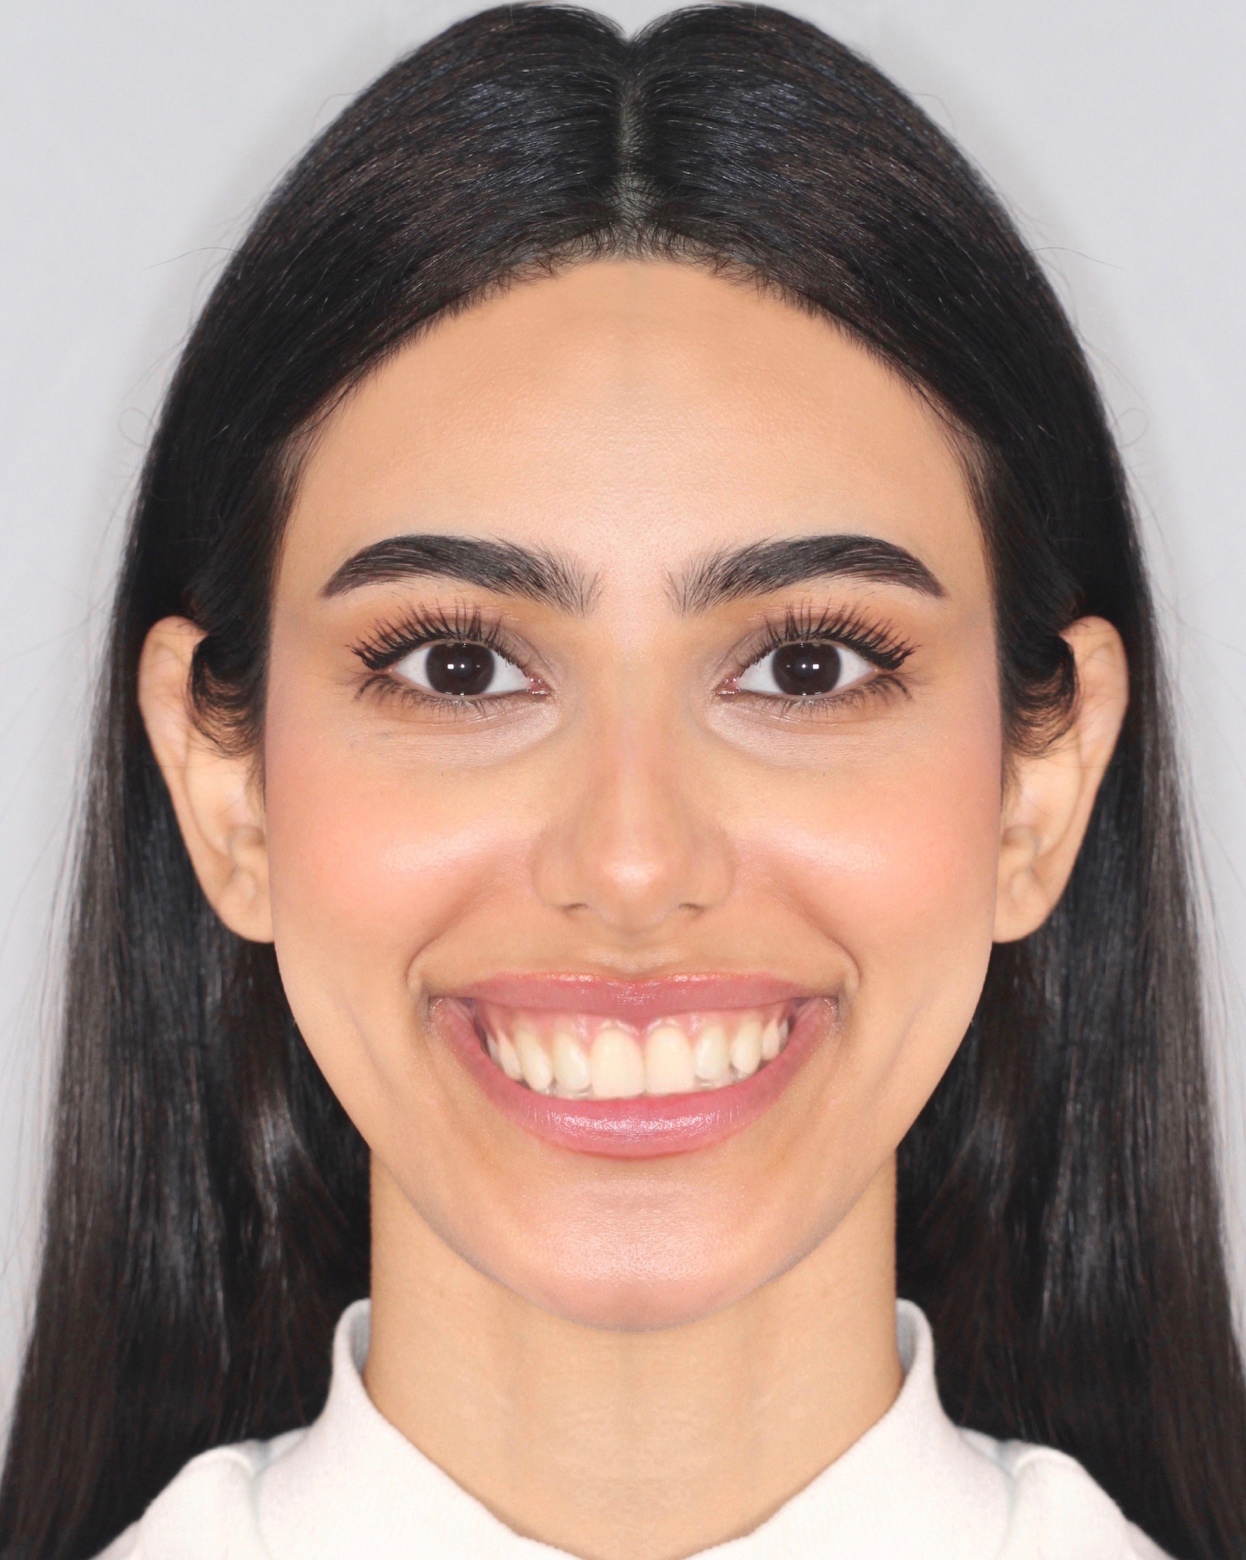


1. Is there an occlusal cant in the following photo: Yes  No


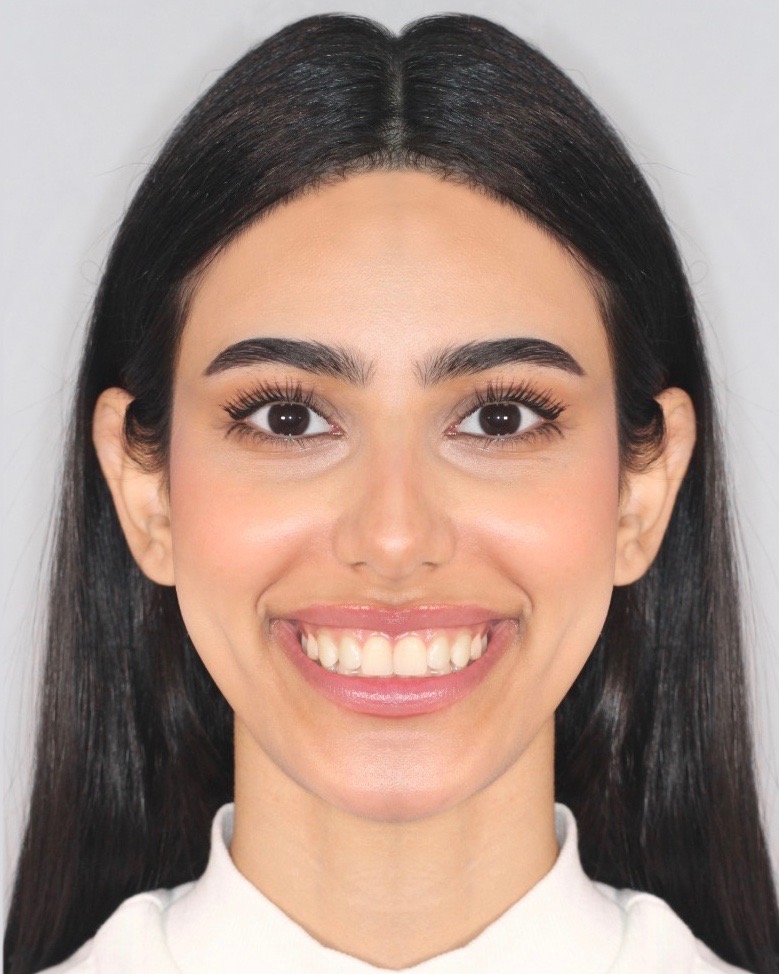


1. Is there an occlusal cant in the following photo: Yes  No


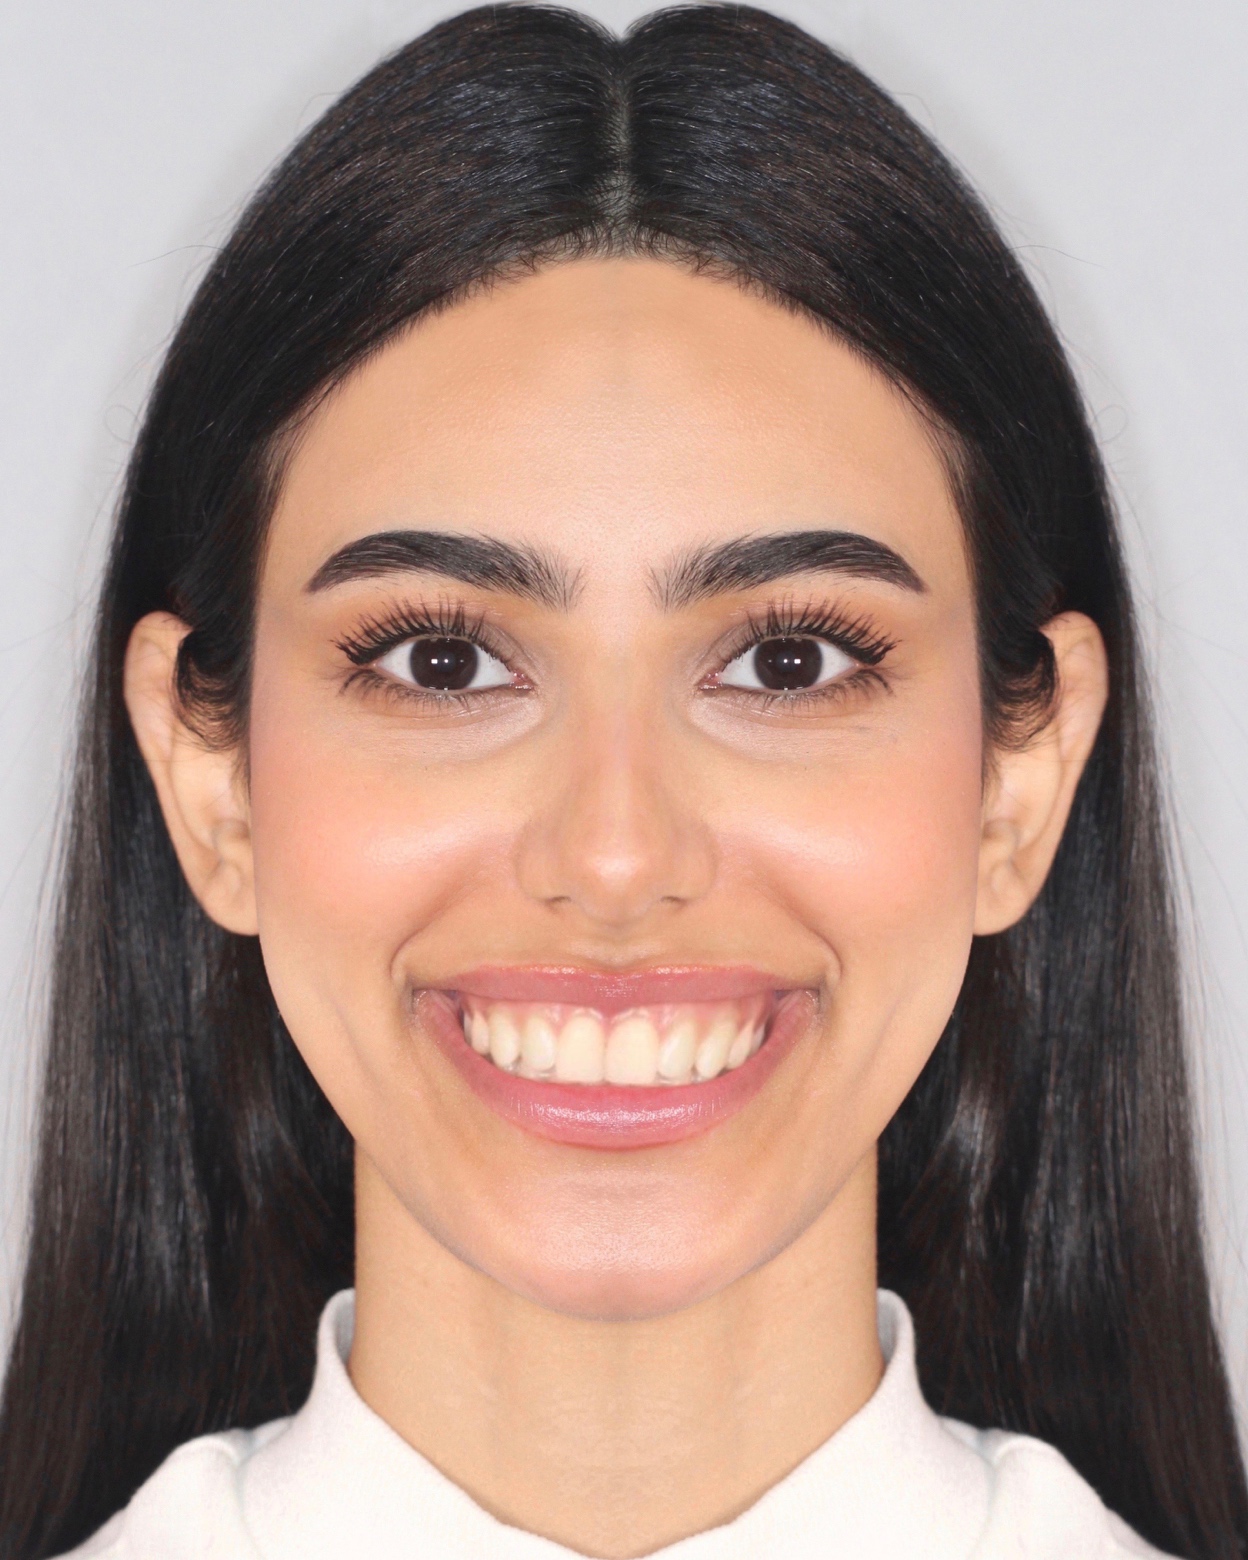


1. Is there an occlusal cant in the following photo: Yes  No


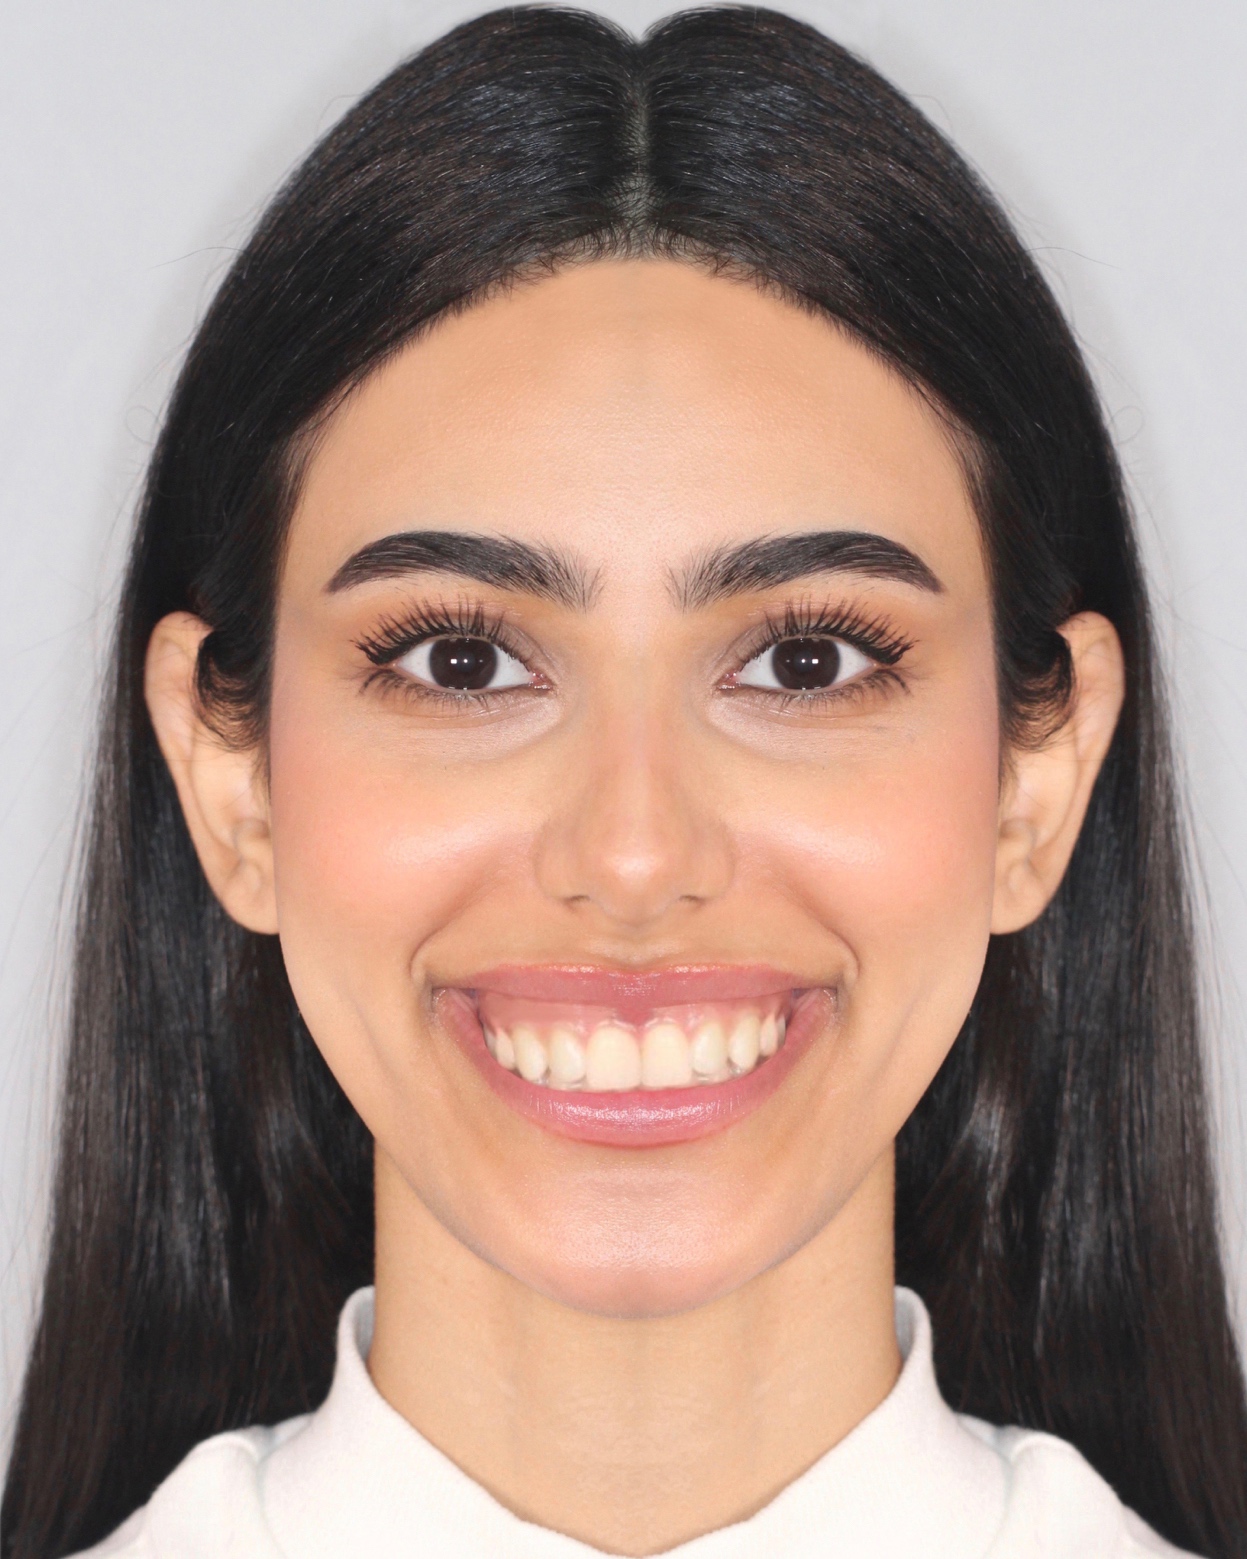


1. Is there an occlusal cant in the following photo: Yes  No


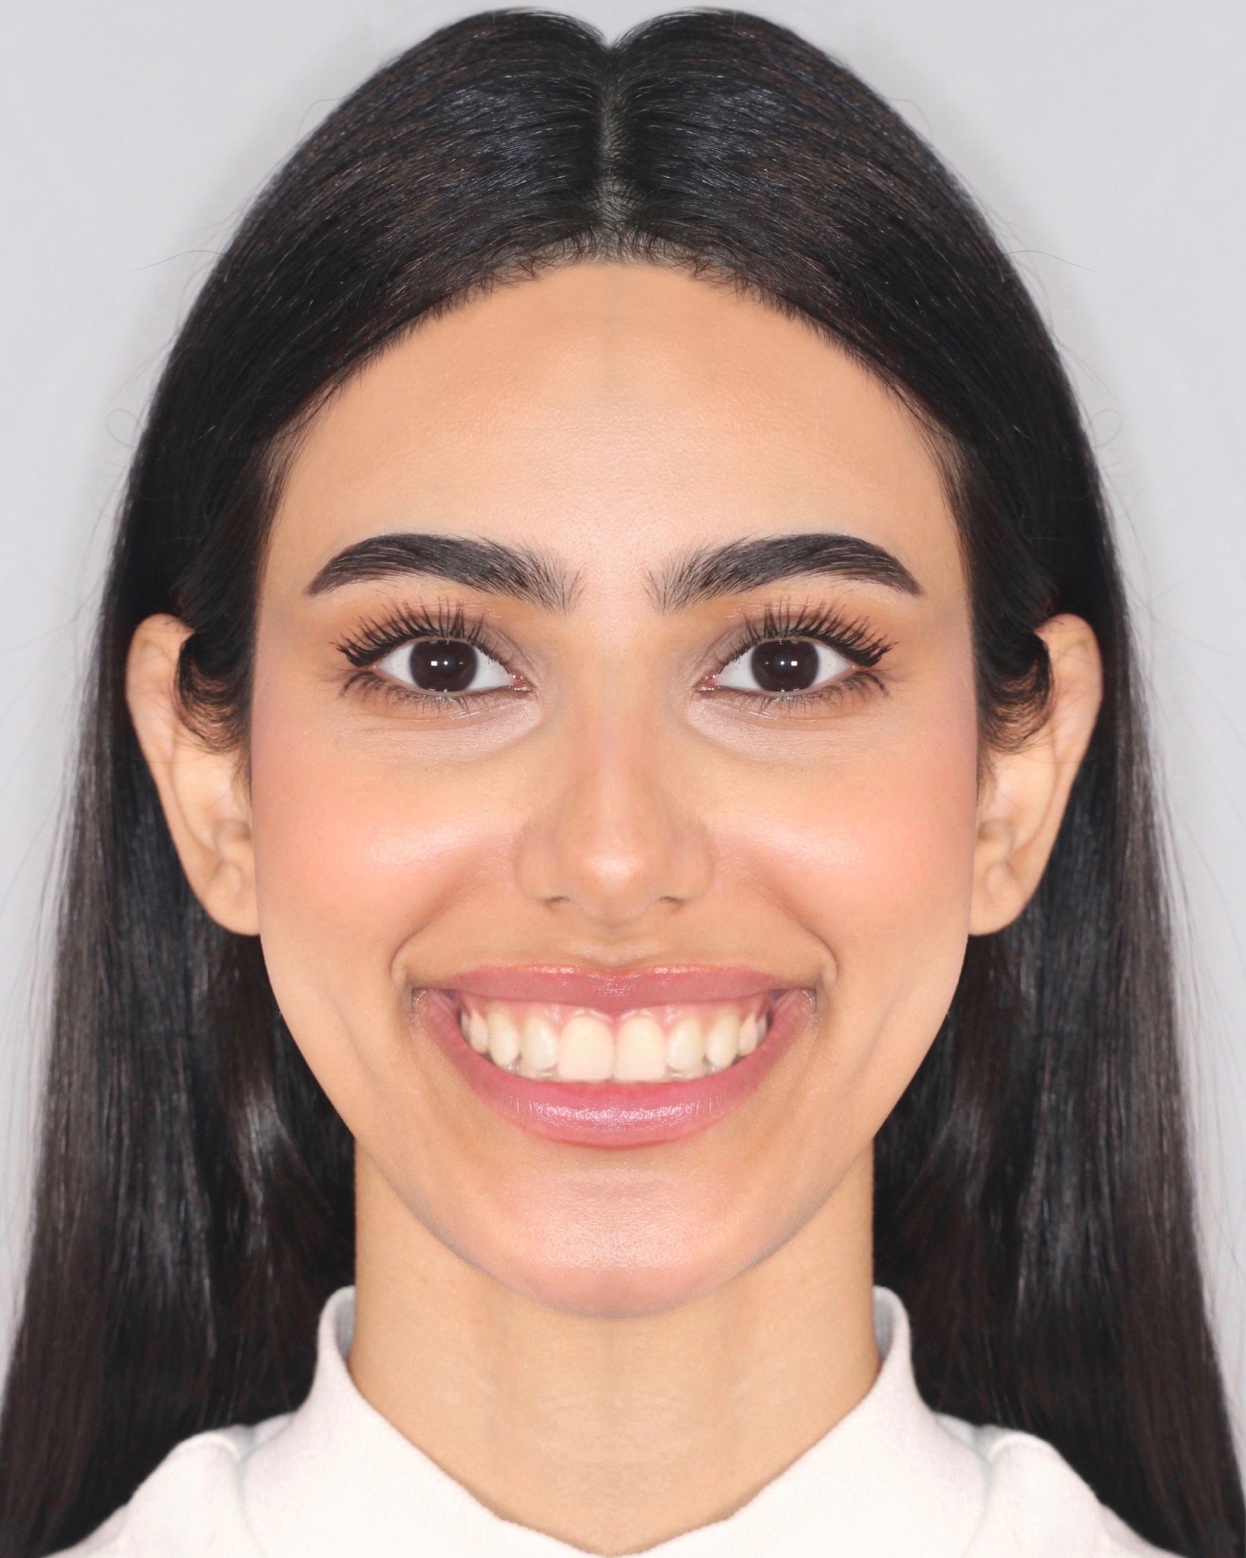


1. Is there an occlusal cant in the following photo: Yes  No


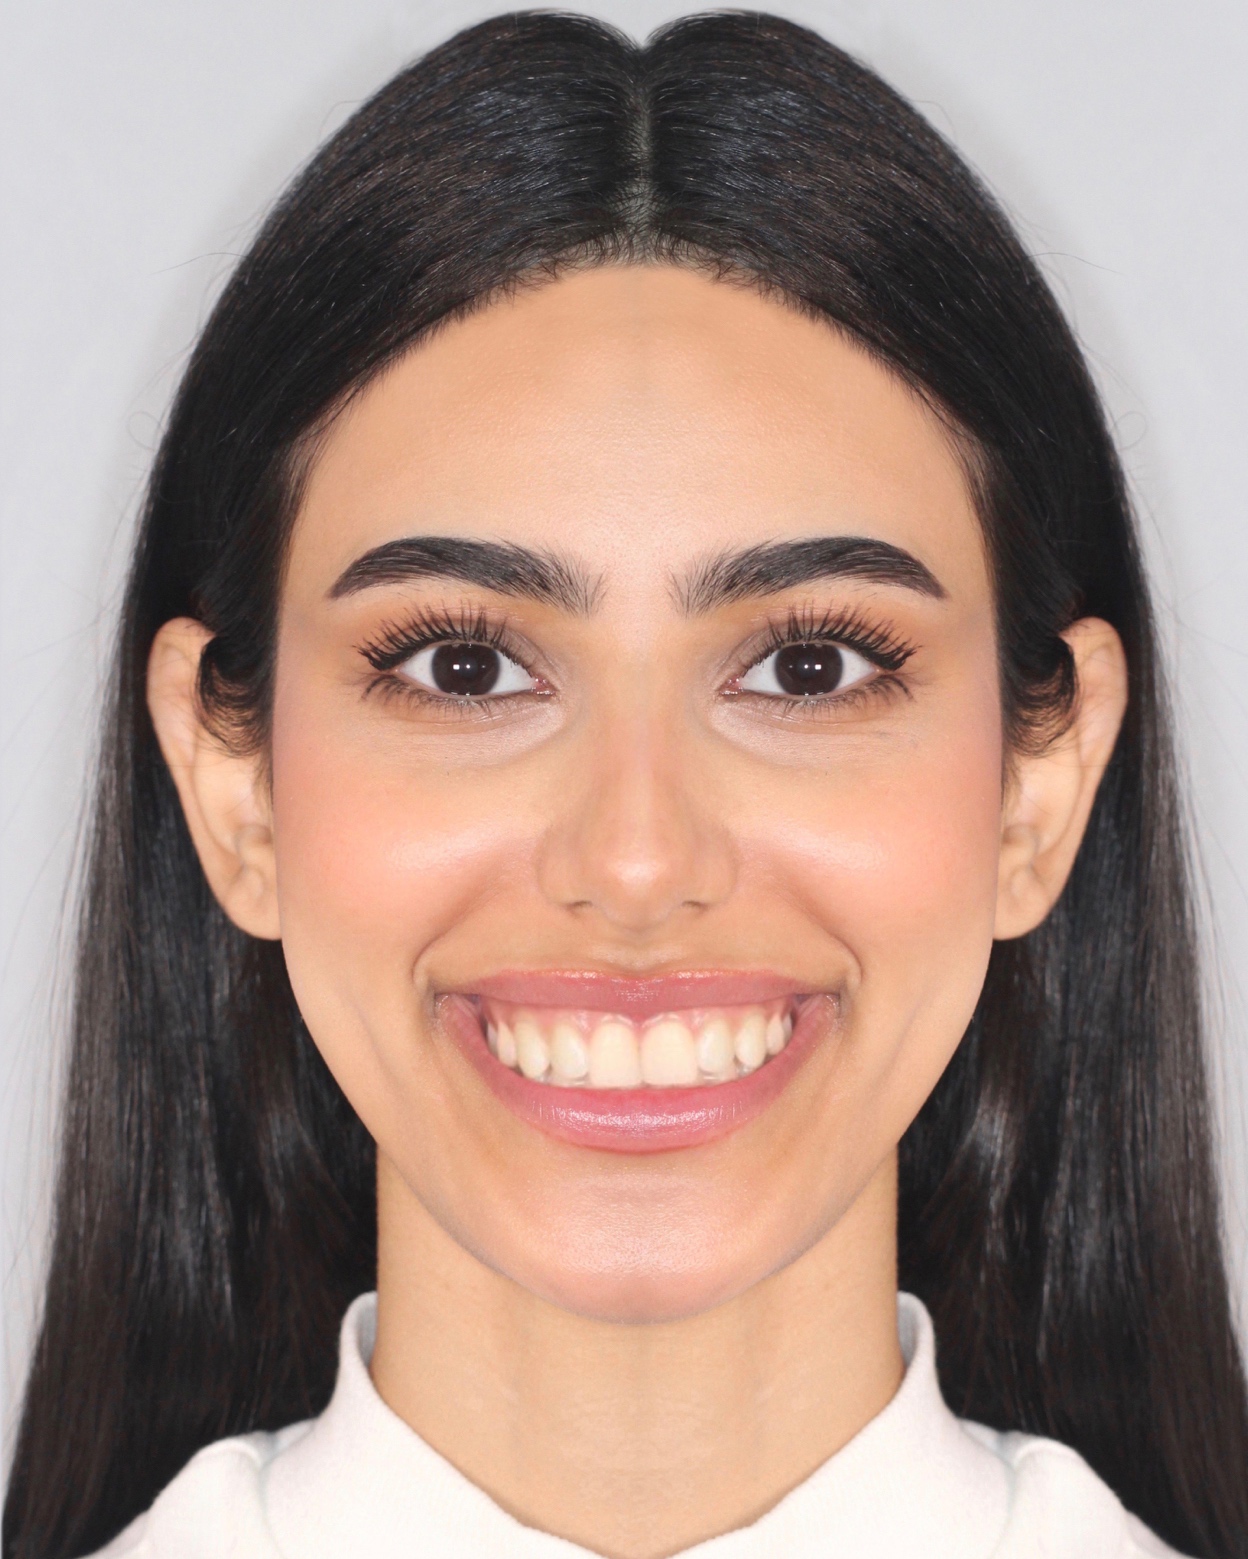


1. Is there an occlusal cant in the following photo: Yes  No


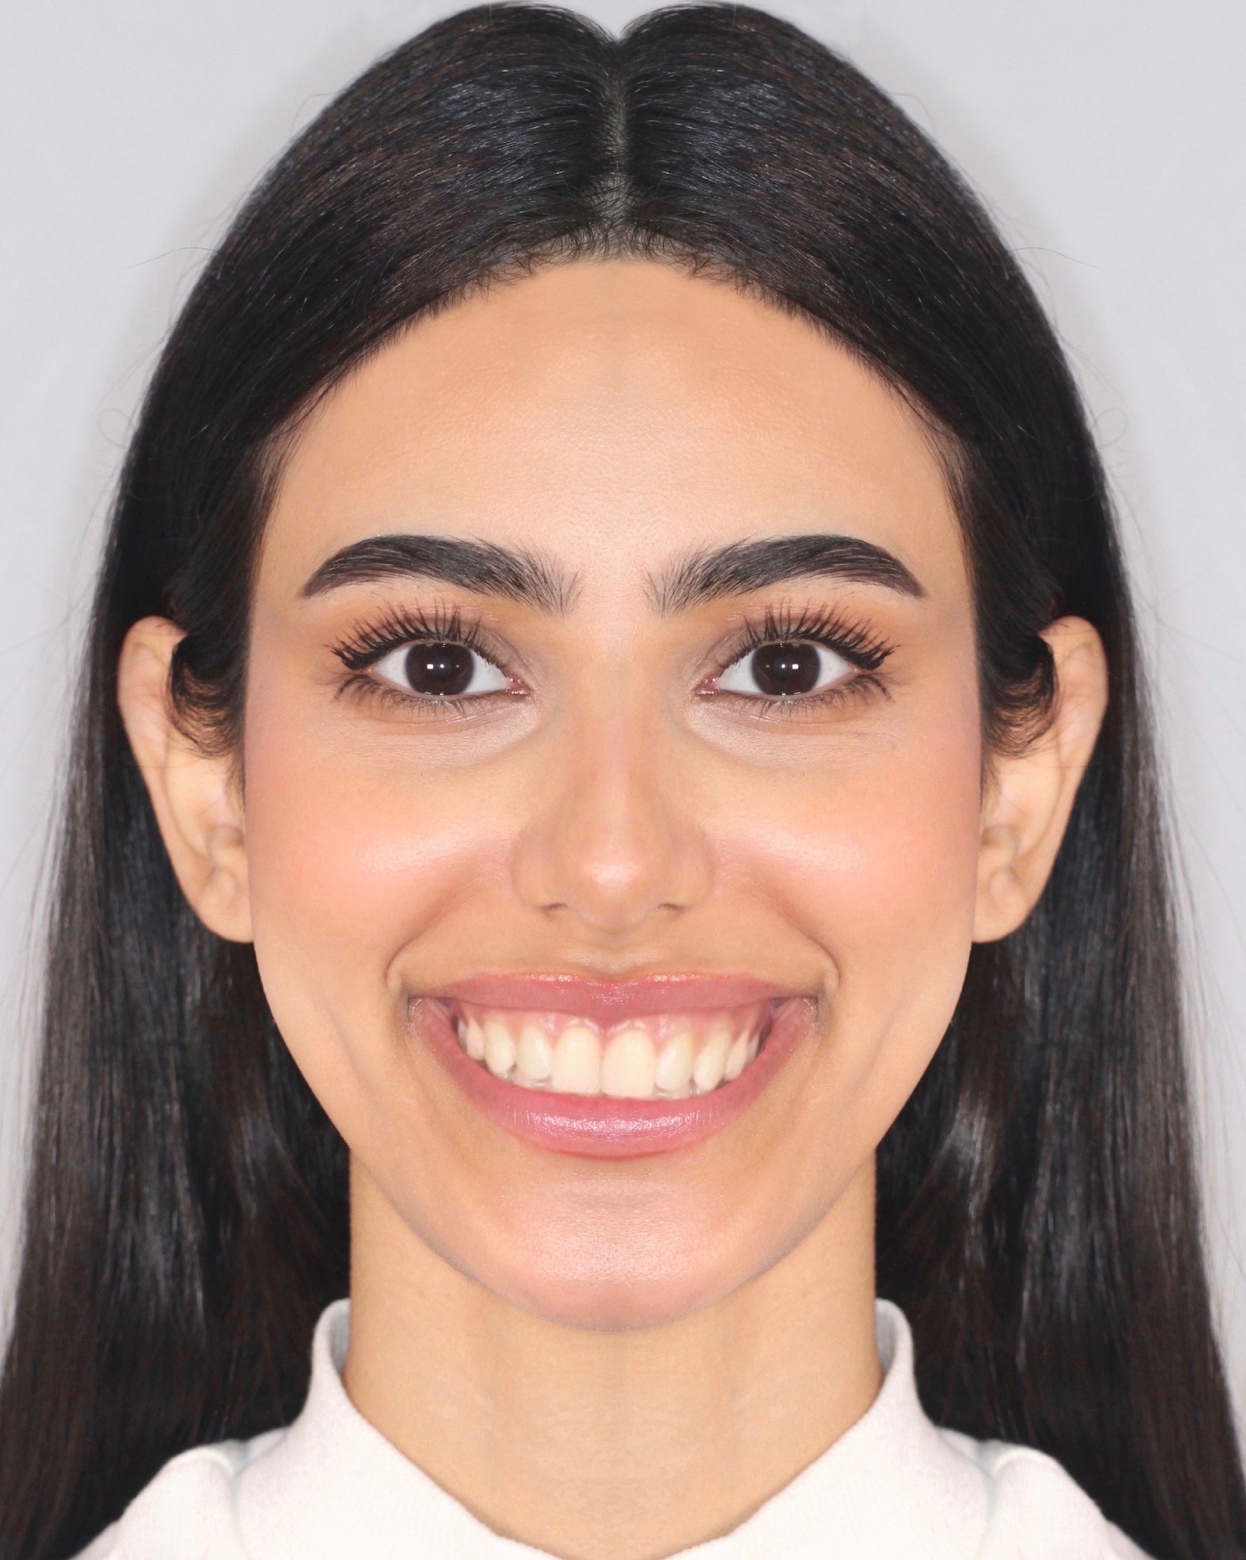

Supplement: Supplementary file 1 [file cca12f59f2a15e73edc054ff.docx]
